# Supplementary material for: The SWI/SNF Subunit INI1 Contains an N-Terminal Winged Helix DNA Binding Domain that Is a Target for Mutations in Schwannomatosis
Source: PubMed Central journal article supplement (PMC4509781; doi:10.1016/j.str.2015.04.021), 2015-07-07
Supplement: mmc1.pdf [file mmc1.pdf]

**Structure, Volume 23**

**Supplemental Information**

**The SWI/SNF Subunit INI1 Contains an N-Terminal  
Winged Helix DNA Binding Domain that Is a Target  
for Mutations in Schwannomatosis**

**Mark D. Allen, Stefan M.V. Freund, Giovanna Zinzalla, and Mark Bycroft**

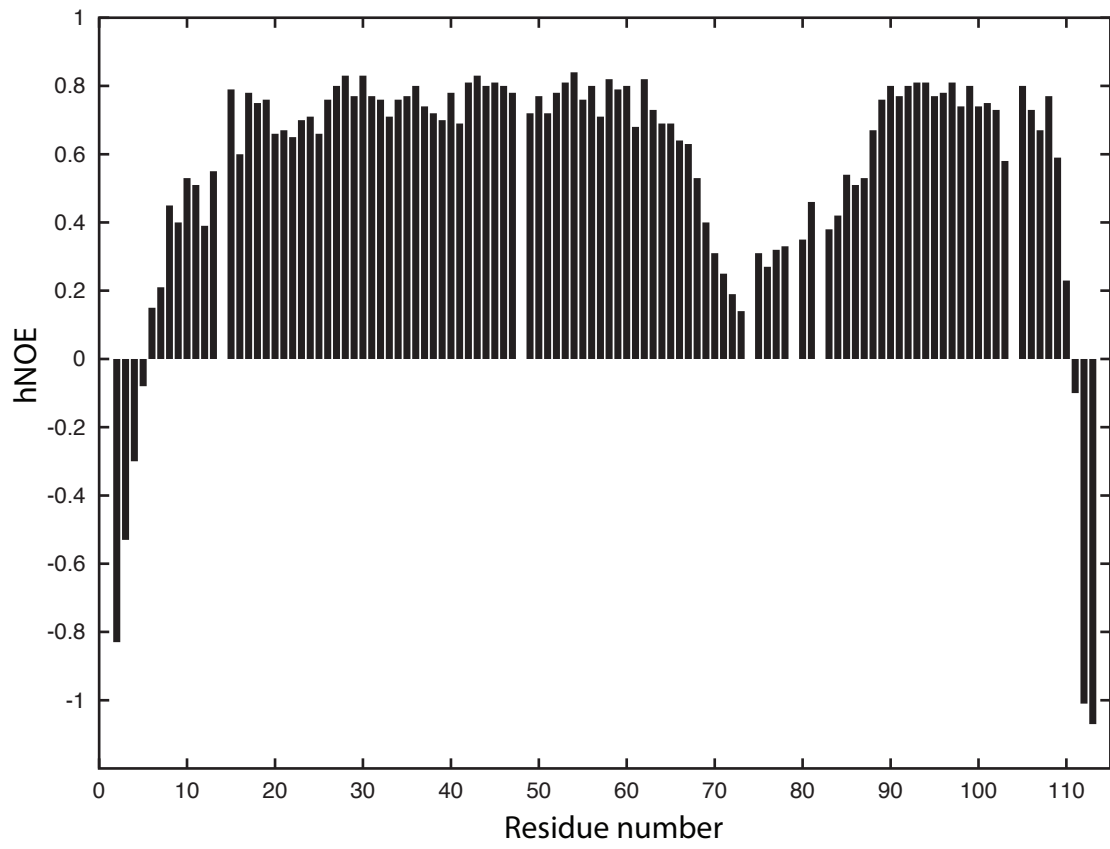

$^1\text{H}$ - $^{15}\text{N}$  heteronuclear NOE values for the INI1 N-terminal domain
